# Supplementary material for: Gene Expression Profiles Controlled by the Alternative Splicing Factor Nova2 in Endothelial Cells
Source: MDPI journal article supplement (doi:10.3390/cells8121498), 2019-11-23
Supplement: s1 [file s1]

# Supplementary Materials: Gene Expression Profiles Controlled by the Alternative Splicing Factor Nova2 in Endothelial Cells

Elisa Belloni, Anna Di Matteo, Davide Pradella, Margherita Vacca, Christopher D.R. Wyatt, Roberta Alfieri, Antonio Maffia, Simone Sabbioneda and Claudia Ghigna

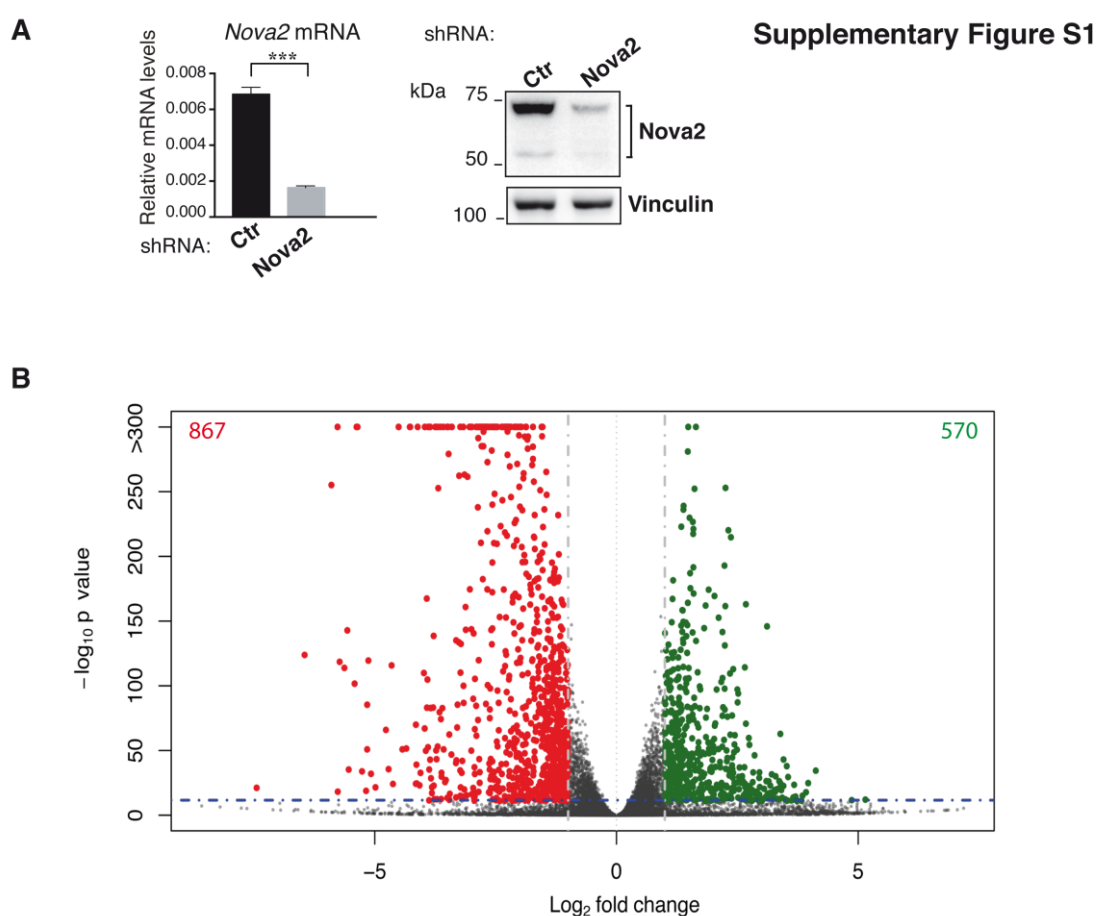

**Figure S1.** Nova2 knockdown in ECs and Volcano plot showing gene expression changes after Nova2 depletion in ECs. **(A)** Validation by RT-qPCR (relative to *Ubb*) and immunoblotting of Nova2 expression levels in moEC transduced with an shRNA against *Nova2* or with a control shRNA. Each bar reports mean  $\pm$  SEM of three independent experiments. \*\*\* $p < 0.001$ . **(B)** Volcano plot: each point represents a gene, with the x axis showing the log<sub>2</sub> FC of gene expression between control and Nova2 depletion and y axis showing the DESeq2  $-\log_{10}$  adjusted p-values. Red and green point show down- and upregulated genes respectively. Grey points show genes that were considered not significant, either with adjusted p-value  $> 1e^{-12}$  and/or absolute log<sub>2</sub> FC  $< 1$ .

A

## Supplementary Figure S2

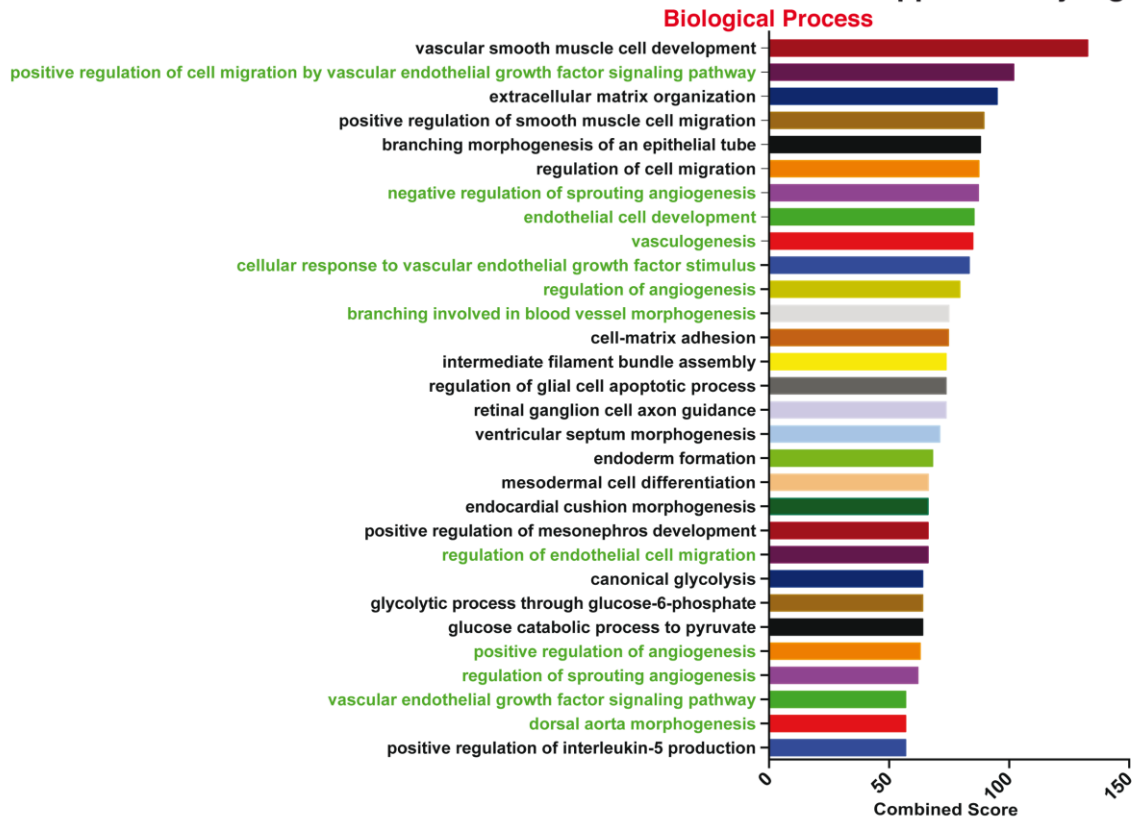

B

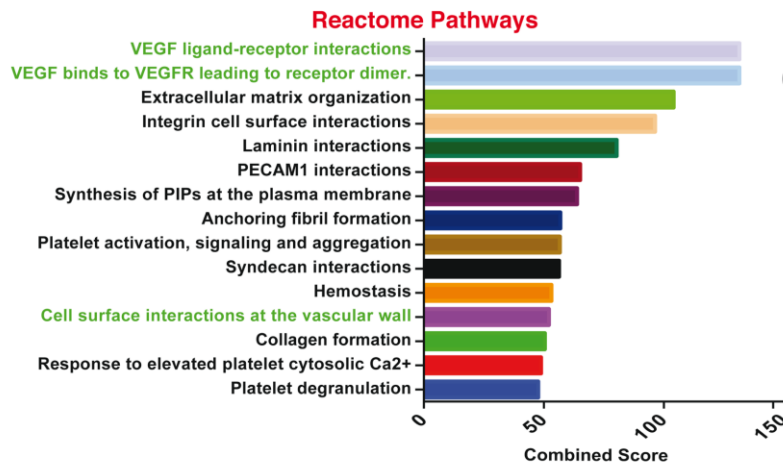

C

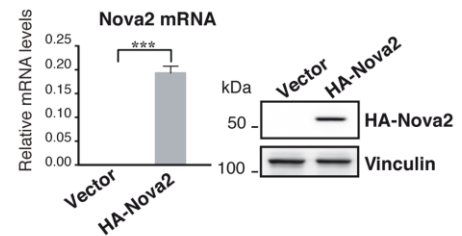

D

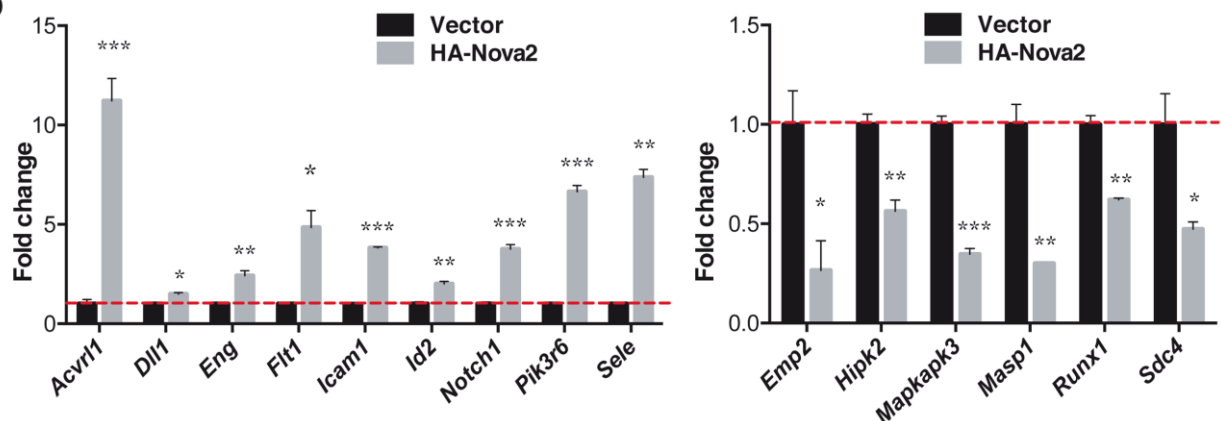

**Figure S2.** GO and cellular pathways analysis of Nova2-mediated DEGs, Nova2 overexpression in ECs and differentially expressed genes after Nova2 upregulation. **(A)** GO analysis of genes showing altered expression levels in Nova2 knockdown moEC by using the Enrichr web tool. The first 30 terms of the GO categories

“Biological Process” are indicated (based on Combined Score). **(B)** Analysis of cellular pathways by using the Enrichr web tool (based on Combined Score). **(C)** Upregulation of HA-tagged Nova2 in moEC was verified by RT-qPCR (relative to *Ubb*) and immunoblotting with an anti-HA antibody. **(D)** Analysis in Nova2 overexpressing moEC of the mRNA levels of selected genes encoding for factors involved in angiogenesis, vascular development or EC functions. The dotted red line indicates the expression level of control cells (empty vector) considered equal to 1. Error bars indicate means  $\pm$  SEM calculated from three independent experiments (n = 3). \*p<0.05, \*\*p<0.01, \*\*\*p<0.001.

### Supplementary Figure S3

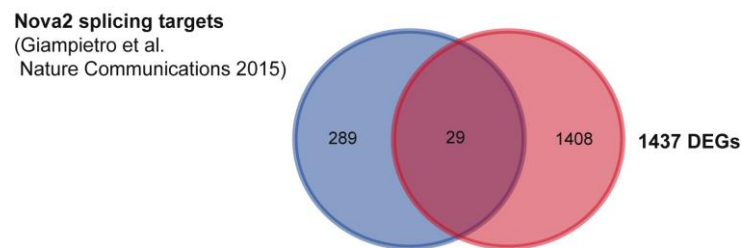

**Figure S3.** Comparison between DEGs and Nova2-regulated genes in ECs. The Venn diagram shows the overlap between genes changing their steady-state mRNA levels in Nova2 knockdown ECs (1437 DEGs) and genes regulated by Nova2 at the level of splicing in the same cells (318 genes for a total of 365 AS events;[28]).

# Supplementary Figure S4

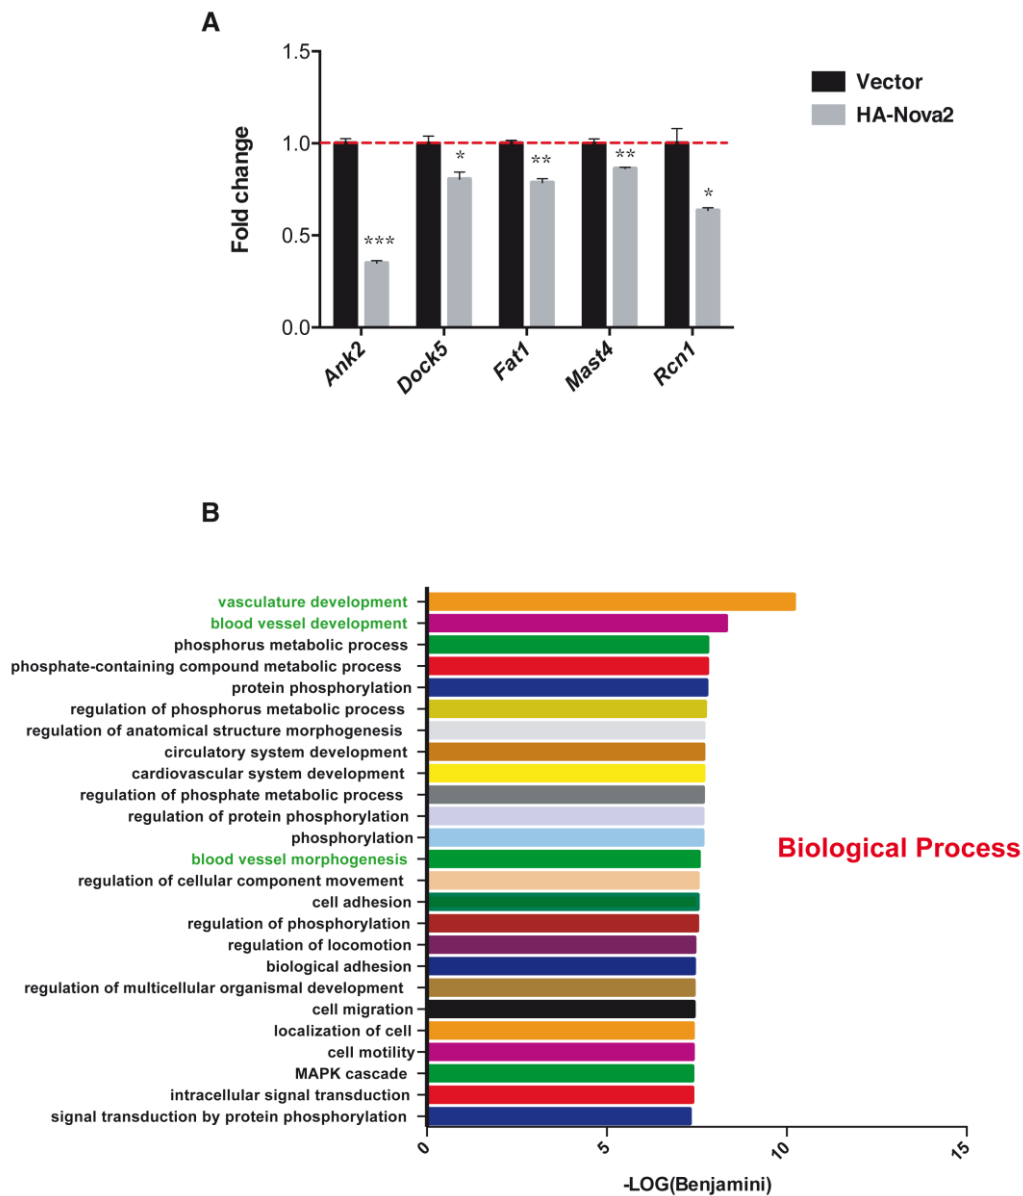

**Figure S4.** Nova2 affects the expression of Ppar- $\gamma$  target genes that are enriched for regulators of EC biology. **(A)** Expression levels of five selected Ppar- $\gamma$  target genes determined by RT-qPCR in Nova2 overexpressing moEC. The dotted red line indicates the expression level of control cells (empty vector) considered equal to 1. **(B)** GO analysis of Ppar- $\gamma$  target genes, showing altered expression levels in Nova2 knockdown moEC, by using the DAVID web tool. The first 25 terms of the GO category “Biological Process” are indicated (sorted by benjamini corrected p-values <0.05). In green GO terms relevant for angiogenesis and vascular development.

## Supplementary Figure S5

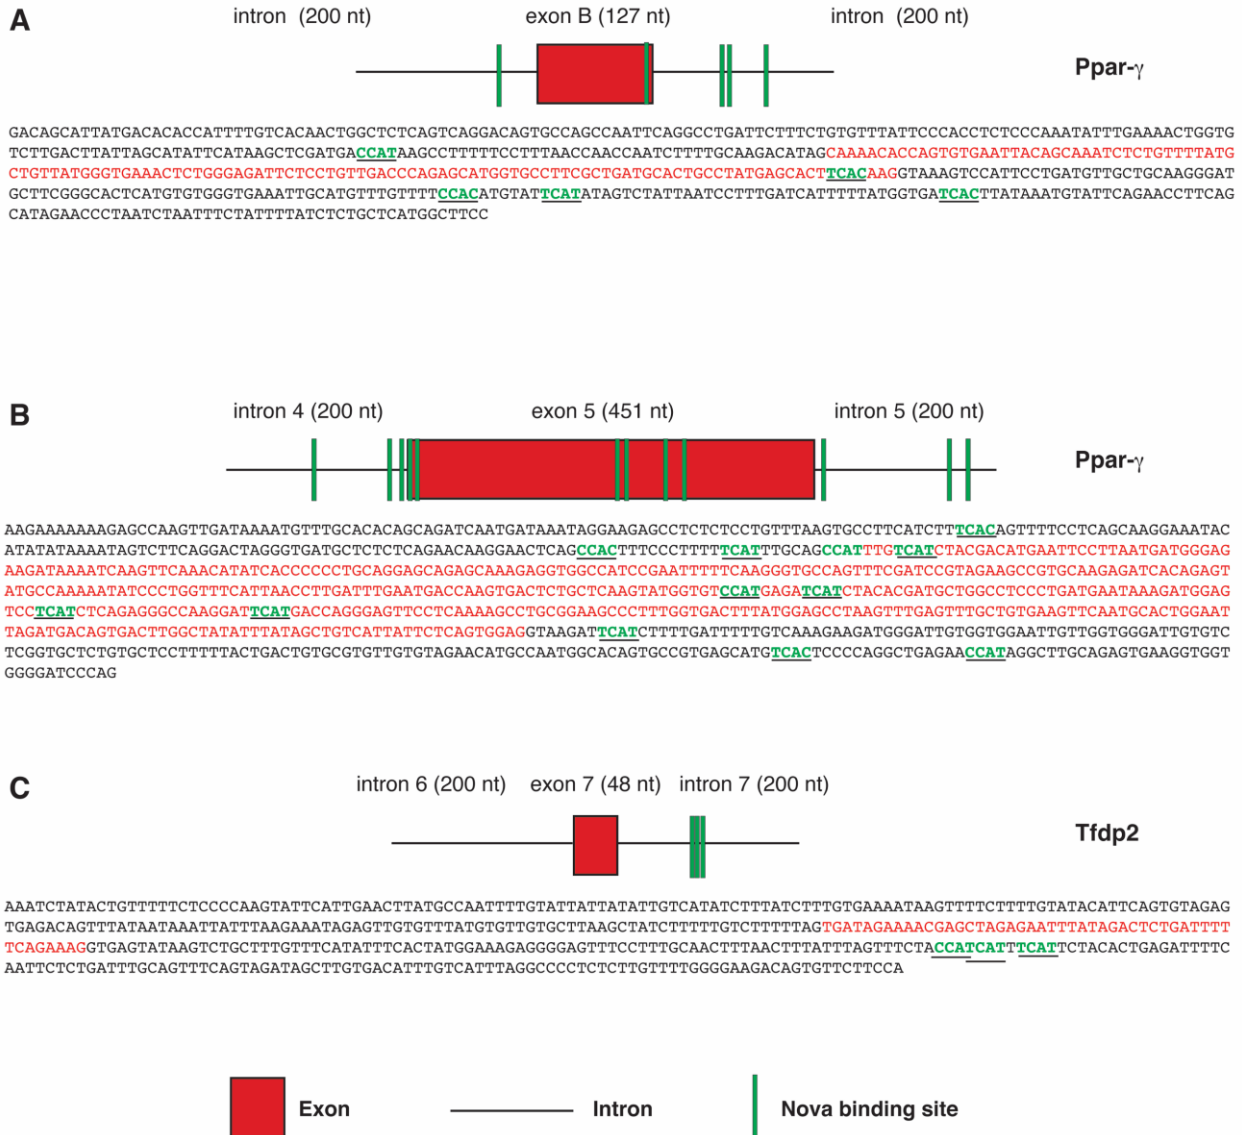

**Figure S5.** Identification of putative Nova binding sites in *Ppar- $\gamma$*  and *Tfdp2* genes. The mouse genomic regions comprising *Ppar- $\gamma$*  exon B (**A**) *Ppar- $\gamma$*  exon 5 (**B**) and *Tfdp2* exon 7 (**C**) plus 200 nt of upstream and 200 nt downstream intronic sequences, were analyzed with the Sfmap program (<http://sfmap.technion.ac.il/>). Putative Nova binding sites (green underlined) were identified by using the following parameters: score 0.9-1 and  $p \leq 0.005$ . Red = exonic sequence; black = intronic sequence. The schematic representation of the genomic region and the position of Nova binding sites is also depicted on top of each gene sequence.

# Supplementary Figure S6

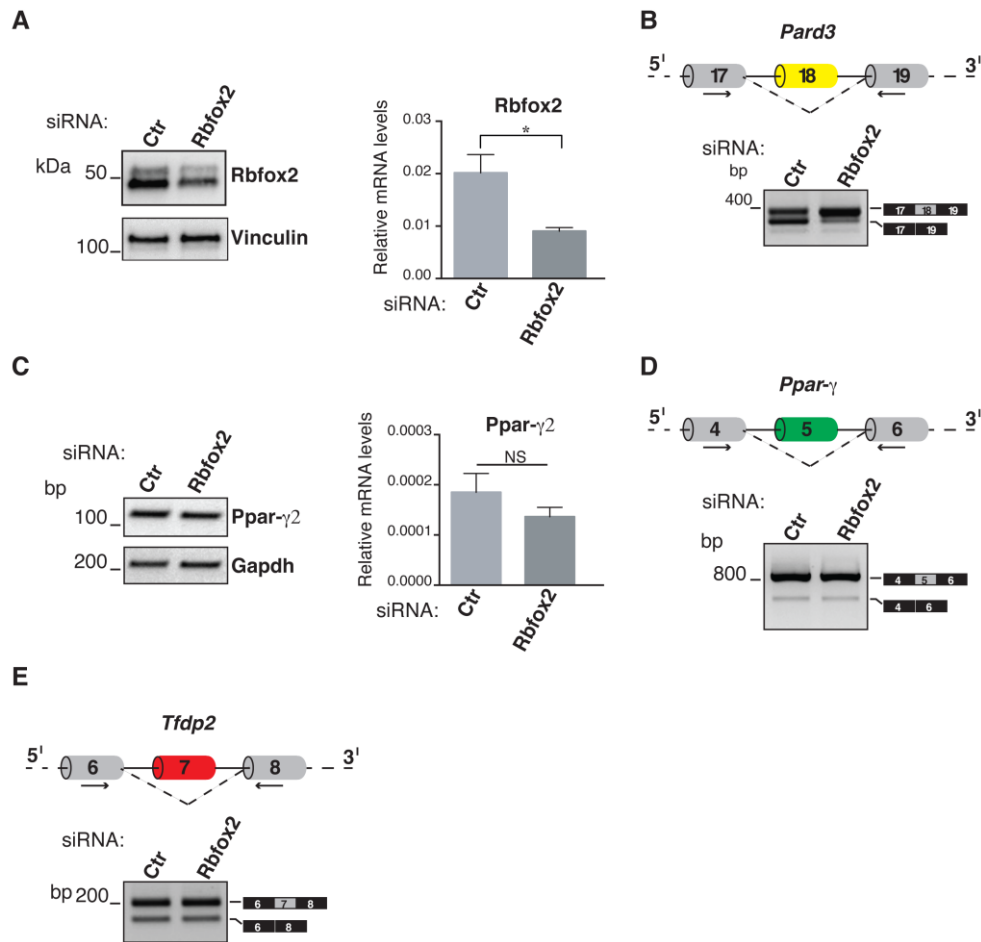

**Figure S6.** Depletion of *Rbfox2* in ECs does not affect AS of *Ppar-γ* and *Tfdp2* pre-mRNAs. **(A)** Rbfox2 mRNA and protein levels after its knockdown in mouse moEC. **(B)** Analysis by RT-PCR of the AS of *Pard3* (a known Rbfox2 target) upon *Rbfox2* silencing in moEC. **(C)** Expression of *Ppar-γ2* mRNA was evaluated by RT-PCR (left) and RT-qPCR (right) in *Rbfox2* depleted moEC. **(D)** RT-PCR analysis of the AS profile of *Ppar-γ* exon 5 and **(E)** *Tfdp2* exon 7 in *Rbfox2* knockdown moEC. Error bars indicate means  $\pm$  SEM calculated from four independent experiments ( $n = 4$ ,  $*p < 0.05$ ). In each diagram, black arrows show the annealing position of the primers used in RT-PCR reactions.

Supplementary Figure S7

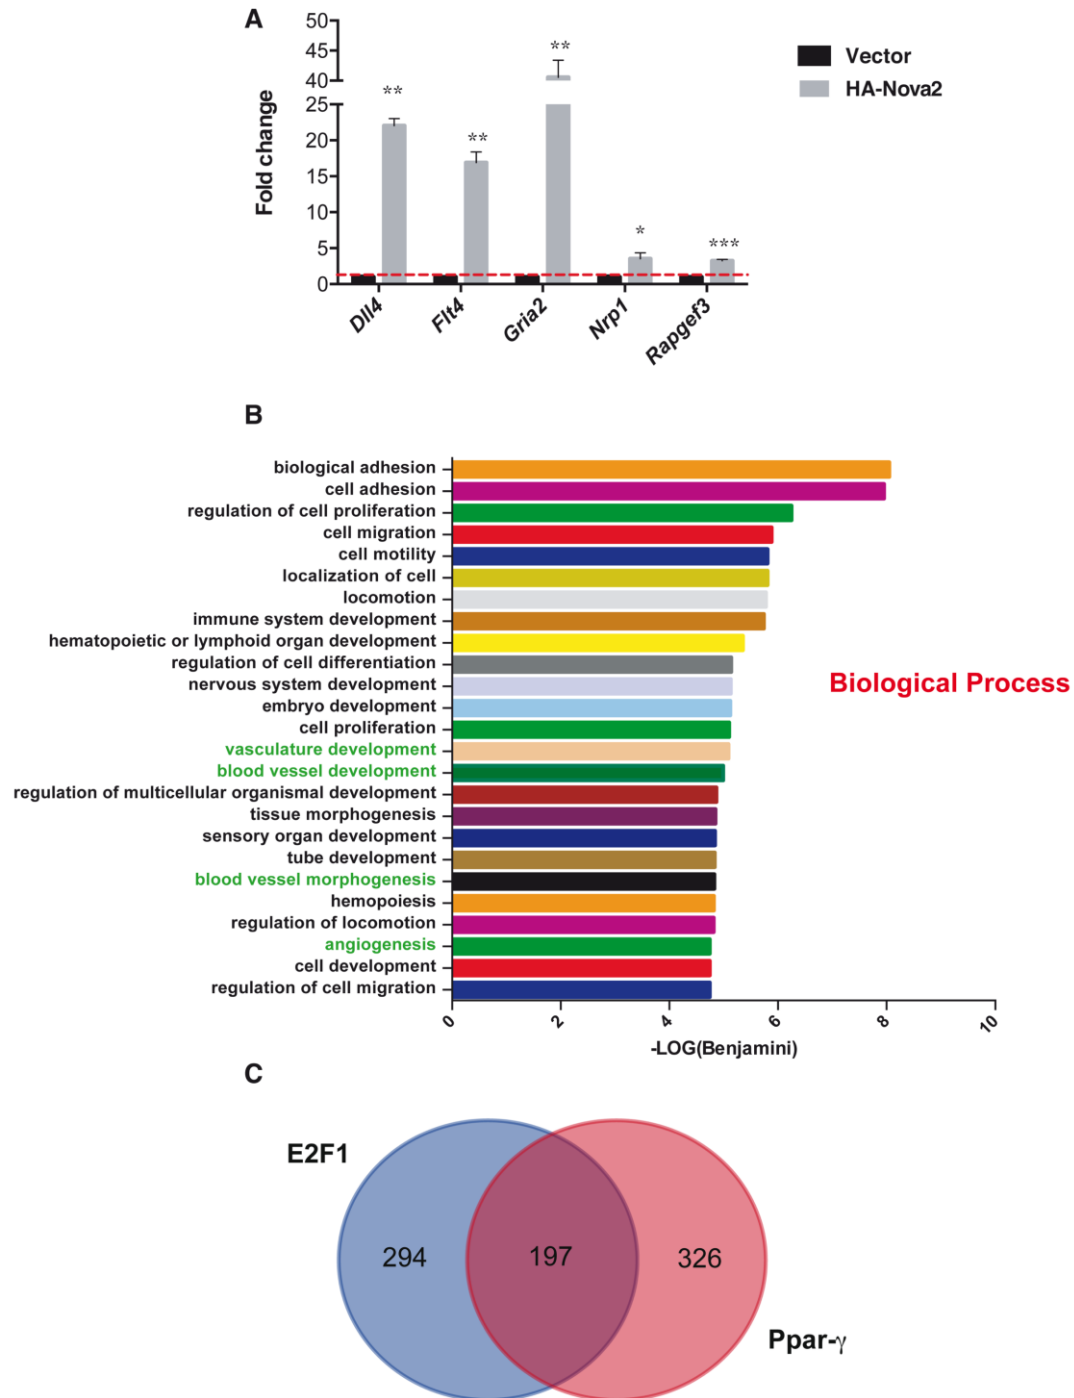

**Figure S7.** Nova2 modulates the expression of E2F1 target genes that are enriched for regulators of EC functions. **(A)** Expression levels of five selected E2F1 targets by RT-qPCR in Nova2 overexpressing moEC. The dotted red line indicates the expression level of control cells (empty vector) considered equal to 1. Error bars indicate means  $\pm$  SEM calculated from three independent experiments ( $n=3$ ), \* $p<0.05$ , \*\* $p<0.01$ , \*\*\* $p<0.001$ . **(B)** GO analysis of E2F1 targets, which expression levels are modulated upon Nova2 silencing in ECs, by using the DAVID web tool. The first 25 terms of the GO category “Biological Process” are indicated (sorted by benjamini corrected  $p$ -values  $<0.05$ ). In green GO terms that are relevant for angiogenesis and vascular development. **(C)** DEGs that are common targets of both Ppar- $\gamma$  and E2F1 transcription factors.

**Table S1.** Primers used in RT-PCR, RT-qPCR reactions and cloning experiments.

| <b>PRIMERS USED IN RT-PCR</b>    |                         |
|----------------------------------|-------------------------|
| <b>PRIMER NAME</b>               | <b>SEQUENCE 5'-3'</b>   |
| Ppar- $\gamma$ _mouse_exon B_for | TTCTCCTGTTGACCCAGAGCA   |
| Ppar- $\gamma$ _mouse_exon 1_rev | TCCACAGAGCTGATTCCGAAG   |
| Ppar- $\gamma$ _mouse_exon 4_for | TGCCTTGCTGTGGGGATGT     |
| Ppar- $\gamma$ _mouse_exon 7_rev | CAGCAGGTTGTCTTGATGT     |
| Gapdh_mouse_for                  | TCAAGAAGGTGGTGAAGCAGG   |
| Gapdh_mouse_rev                  | ACCAGGAAATGAGCTTGACAAA  |
| Tfdp2_mouse_for                  | CCGCAATGGTCACTCAGACT    |
| Tfdp2_mouse_rev                  | TGTGCCTTTCCGCTGAACCT    |
| Pard3_mouse_for                  | CTCGCTTTTCAACGGGAAGG    |
| Pard3_mouse_rev                  | TCCATGCCTTCGTCGTCATC    |
|                                  |                         |
| <b>PRIMERS USED IN RT-qPCR</b>   |                         |
| <b>PRIMER NAME</b>               | <b>SEQUENCE 5'-3'</b>   |
| Ubb_mouse_for                    | CCGGCAAGCAGCTAGAAGAT    |
| Ubb_mouse_rev                    | ATTGGGGCAAGTGGCTAGAG    |
| Acvrl1_mouse_for                 | GGCCTTTGGCCTAGTGCTAT    |
| Acvrl1_mouse_rev                 | GGGGTCATTGGGTACCATGT    |
| Dll1_mouse_for                   | ATCCGATACCCAGGTTGTCT    |
| Dll1_mouse_rev                   | CAGGAACATGTGTAGCTCCC    |
| Eng_mouse_for                    | TGTTCTTGGTCCTCGTTTCG    |
| Eng_mouse_rev                    | GCCCAGTCGAGGATCTGTTT    |
| Flt1_mouse_for                   | GAAAAGTCCGTGTCCTCGCT    |
| Flt1_mouse_rev                   | TGATTGTTGGCCGAGGGATG    |
| Icam1_mouse_for                  | GCCAATTTCTCATGCCGCAC    |
| Icam1_mouse_rev                  | GTGTCGAGCTTTGGGATGGTA   |
| Id2_mouse_for                    | AGCAAAGTACTCTGTGGCTAAAT |
| Id2_mouse_rev                    | TCTCCTGGTGAAATGGCTGAT   |
| Notch1_mouse_for                 | ATTTTAGCGACGGCCACTGT    |
| Notch1_mouse_rev                 | CAGCACAGTCTAGGCCATCC    |
| Pik3r6_mouse_for                 | ACCTCACCAAATGCTGCTTC    |
| Pik3r6_mouse_rev                 | GGATACTGGATGTCCGGAAGG   |
| Sele_mouse_for                   | GCAGAGTTTCACGTTGCAGG    |
| Sele_mouse_rev                   | CTGTGGCGCAGATAAGGCT     |
| Emp2_mouse_for                   | TCTGGAGAGTGTGCACCAAC    |
| Emp2_mouse_rev                   | GAGAGGATCATGGTGGCCTG    |
| Hipk2_mouse_for                  | CCAAATTTGTGCCCCGACCTG   |



|                                            |                          |
|--------------------------------------------|--------------------------|
| Hipk2_mouse_rev                            | GGACAGCATTTTCCATCCGC     |
| Mapkapk3_mouse_for                         | TAATGCGGGACATTGGCACT     |
| Mapkapk3_mouse_rev                         | TGGCAAAGCCAAAATCGGTG     |
| Masp1_mouse_for                            | CAAAGCCAGGAGCTCACAGA     |
| Maps1_mouse_rev                            | CACGGTATGGGCTGAAACCT     |
| Runx1_mouse_for                            | CTGCTCCGTGCTACCCACT      |
| Runx1_muose_rev                            | AGTAGTTTTTCATCGTTGCCTGC  |
| Sdc4_mouse_for                             | TGACTTTGAGCTCTCGGGTT     |
| Sdc4_mouse_rev                             | GGGCTCAATCACTTCAGGGAA    |
| Ank2_mouse_for                             | ACATACCCCCAGAGACGGT      |
| Ank2_mouse_rev                             | CTCCTCCTTCTCTGTGCCATC    |
| Dock5_mouse_for                            | ACTCCCAAAGCCACGAGAAC     |
| Dock5_mouse_rev                            | CATACGGTTTGCTTTTGGGGG    |
| Fat1_mouse_for                             | CTTCCAACTCGCCCTCAGAC     |
| Fat1_mouse_rev                             | GTATGGCTGGGAGGGCTTTT     |
| Mast4_mouse_for                            | GCTTAGTGAGGATGGGAAGCA    |
| Mast4_mouse_rev                            | CGAGGTTGGACGTCTCCG       |
| Rcn1_mouse_for                             | CCTCAGGACTACGACCATGC     |
| Rcn1_mouse_rev                             | AGGTCTTCCCCGTAGTTGGT     |
| Nova2_mouse_for                            | TGCTGTCCACAGCTTTATCG     |
| Nova2_mouse_rev                            | GCTCCTCCCTTACCGATGAT     |
| Nova2_human_for                            | CAGCTTTATTGCCGAGAAGG     |
| Nova2_human_rev                            | ACCCATGCTCCTGACTGTTC     |
| Ppar- $\gamma$ _mouse_exon B_for           | TTCTCCTGTTGACCCAGAGCA    |
| Ppar- $\gamma$ _mouse_exon 1_rev           | TCCACAGAGCTGATTCCGAAG    |
| Dll4_mouse_for                             | TGAGAAGCCAGAGTGTCGAA     |
| Dll4_mouse_rev                             | GCTGGGTGTCTGAGTAGGCT     |
| Flt4_mouse_for                             | CTTGGTGTCCATTCCCGGC      |
| Flt4_mouse_rev                             | AACAGTTGAGTGGGCACCCG     |
| Gria2_mouse_for                            | TACGGCAGAAGGAGTAGCCA     |
| Gria2_mouse_rev                            | TTTCATGGTGTGCGCAAGGCT    |
| Nrp1_mouse_for                             | CTACAGCTGGACCAACCACA     |
| Nrp1_mouse_rev                             | CCTCCTGTGAGCTGGAAGTC     |
| Rapgef3_mouse_for                          | ATTCTGCCGGTGATGTTCGT     |
| Rapgef3_mouse_rev                          | TCATGCACTTCCTGTGGGTC     |
| Rbfox2_mouse_for                           | CCAACAAGAAGATGGTCACG     |
| Rbfox2_mouse_rev                           | TGTTGATGCCTCCTCTTCCT     |
| Rplp0_human_for                            | ATGCCCAGGGAAGACAGGGCG    |
| Rplp0_human_rev                            | CGAAGGGACATGCGGATCTGCTGC |
| Dll4_human_for                             | CAACCAGGGGGCCAACTATG     |
| Dll4_human_rev                             | CAAGGGTTACGGGCACAGTC     |
|                                            |                          |
| <b>PRIMERS USED IN CLONING EXPERIMENTS</b> |                          |

| PRIMER NAME                  | SEQUENCE 5'-3'                |
|------------------------------|-------------------------------|
| Tfdp2_mouse_PGFPC1_BglII_for | GGAAGATCTATGACGGCAAAAAATGTTGG |
| Tfdp2_mouse_PGFPC1_KpnI_rev  | CGGGGTACCTTATTCTGGGGAGGAGGGAT |

**Table S3.** Genes encoding for transcriptional regulators for which Nova2-mediated AS is predicted to generate different protein isoforms from [28].

| GO Term                                                              | Nr. Genes | Genes                                               |
|----------------------------------------------------------------------|-----------|-----------------------------------------------------|
| transcription factor complex                                         | 8         | Dcp1a, Hax1, Nfya, Taf4b, Tcf12, Tfdp2, Tfe3, Trrap |
| chromatin assembly or disassembly                                    | 3         | Baz2a, H2afy, Smarcd3                               |
| chromatin remodeling                                                 | 6         | Baz1a, Baz2a, Chd8, Nasp, Scmh1, Smarcd3            |
| chromatin silencing                                                  | 3         | Baz2a, Phf8, Ubr2                                   |
| ligand-dependent nuclear receptor transcription coactivator activity | 3         | Ncoa1, Pparg, Smarcd3                               |
| regulation of gene expression, epigenetic                            | 4         | Baz2a, H2afy, Phf8, Ubr2                            |
| histone binding                                                      | 4         | Baz2a, Chd8, Nasp, Phf8                             |
| negative regulation of gene expression, epigenetic                   | 3         | Baz2a, Phf8, Ubr2                                   |
| SWI/SNF superfamily-type complex                                     | 3         | Baz1a, Smarcd3, Trrap                               |
